# Supplementary material
Source: HighWire-hosted journal article supplement (https://jitc.bmj.com/content/8/2/e000494)

Fig. S8

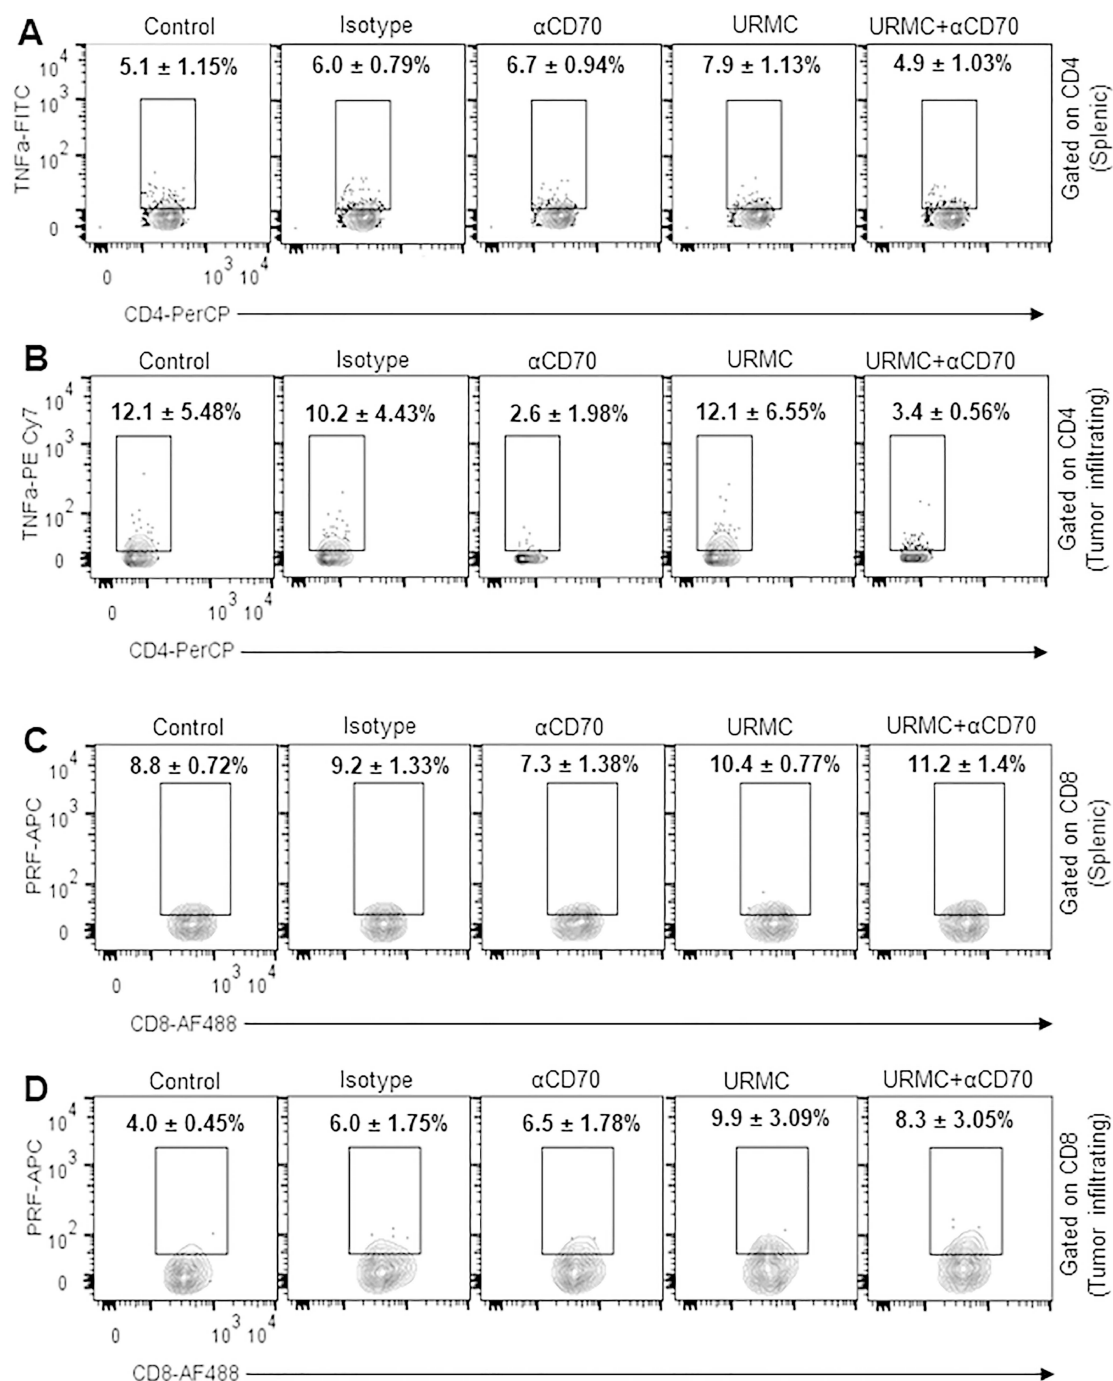

Supplement: inline-supplementary-material-11 [file inline-supplementary-material-11.pdf]

Fig. S9

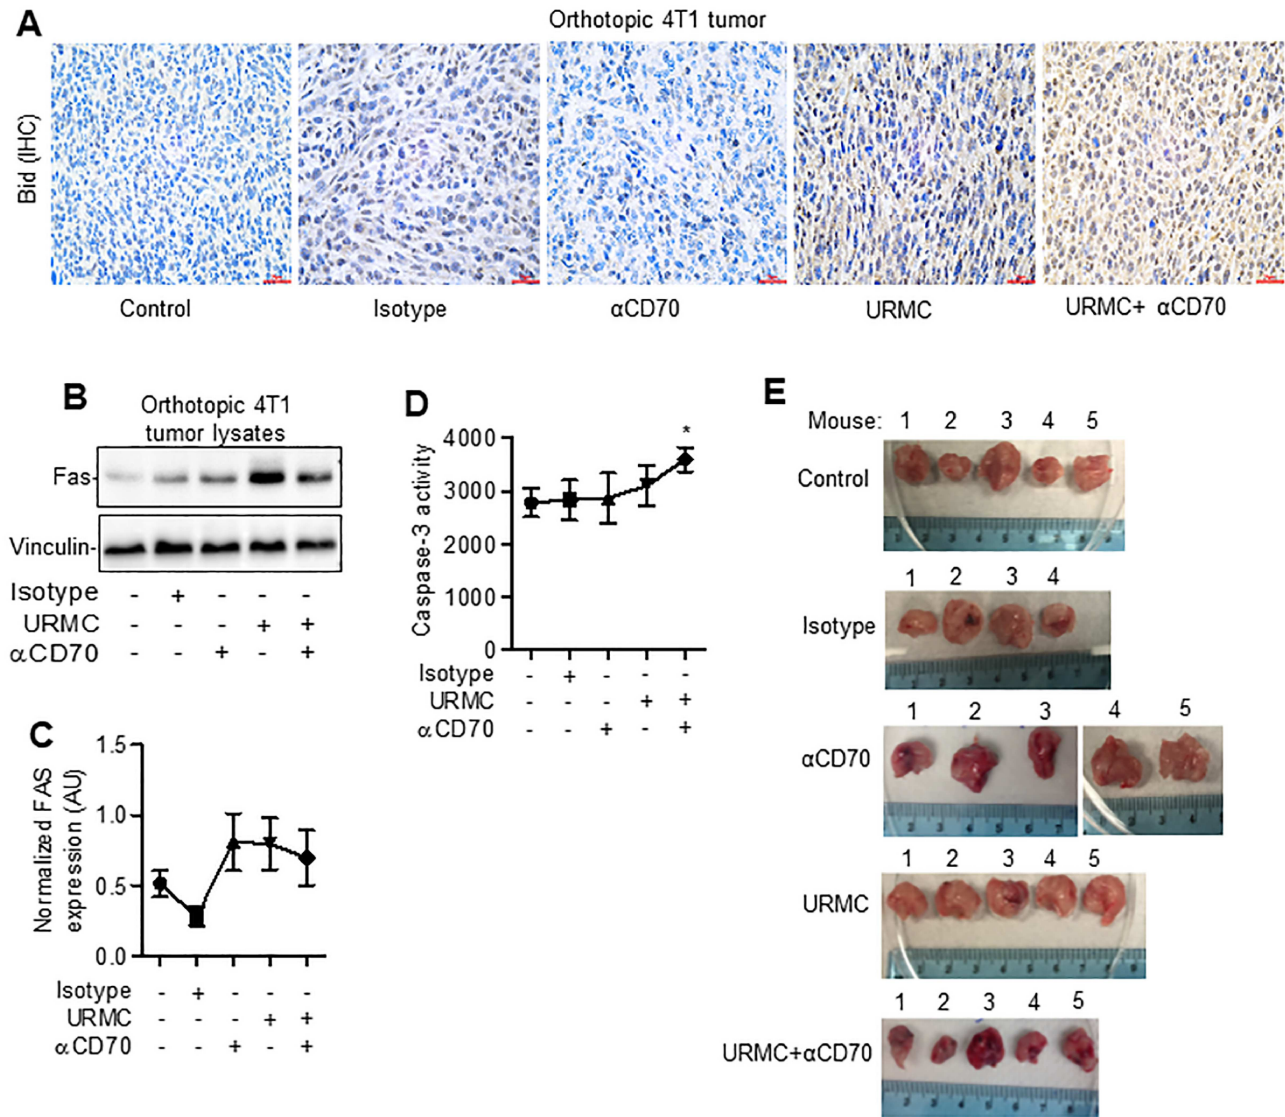

Supplement: inline-supplementary-material-13 [file inline-supplementary-material-13.pdf]

Fig. S10

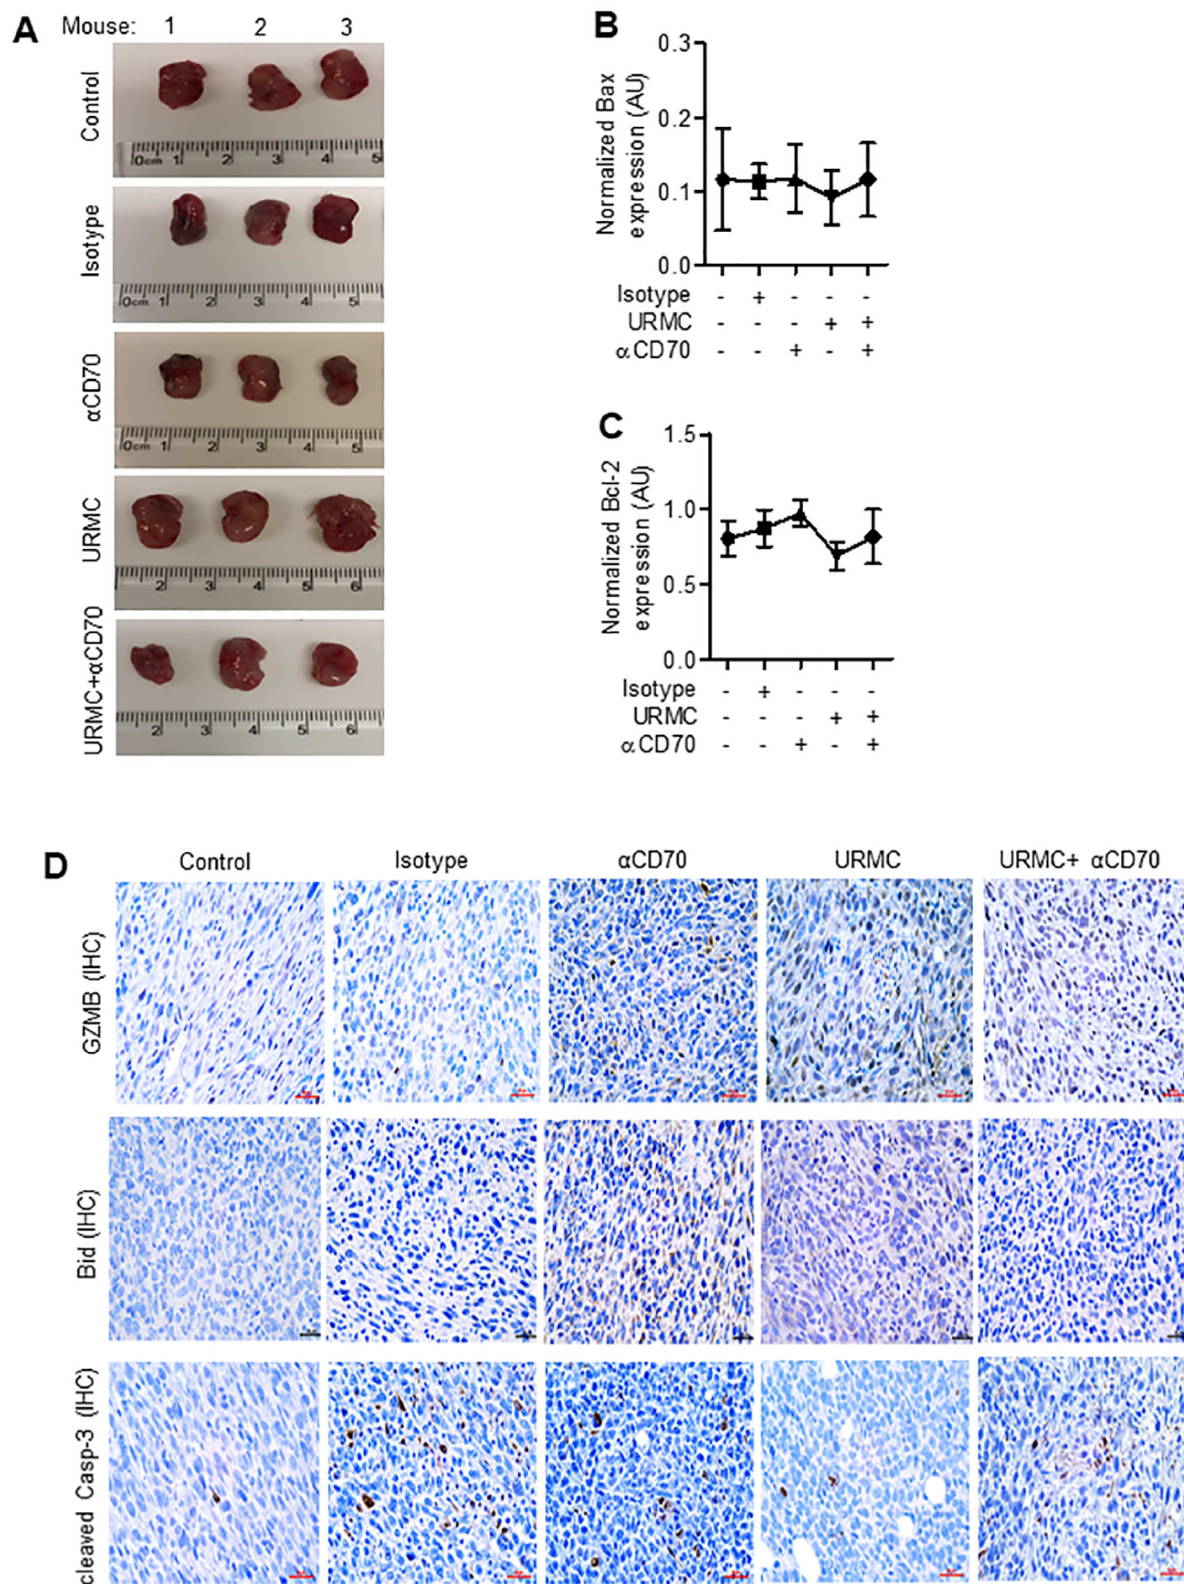

Supplement: inline-supplementary-material-14 [file inline-supplementary-material-14.pdf]

Fig. S1

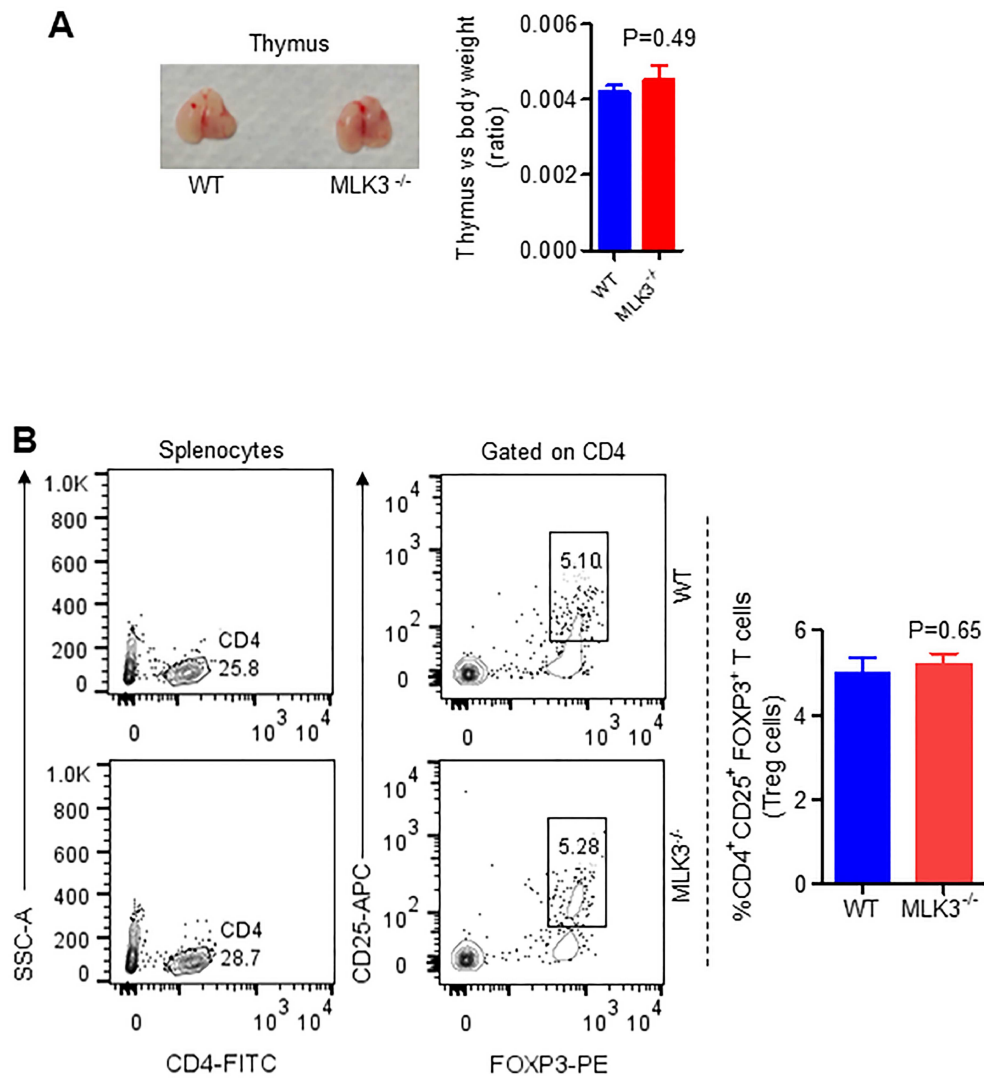

Supplement: inline-supplementary-material-2 [file inline-supplementary-material-2.pdf]

Fig. S2

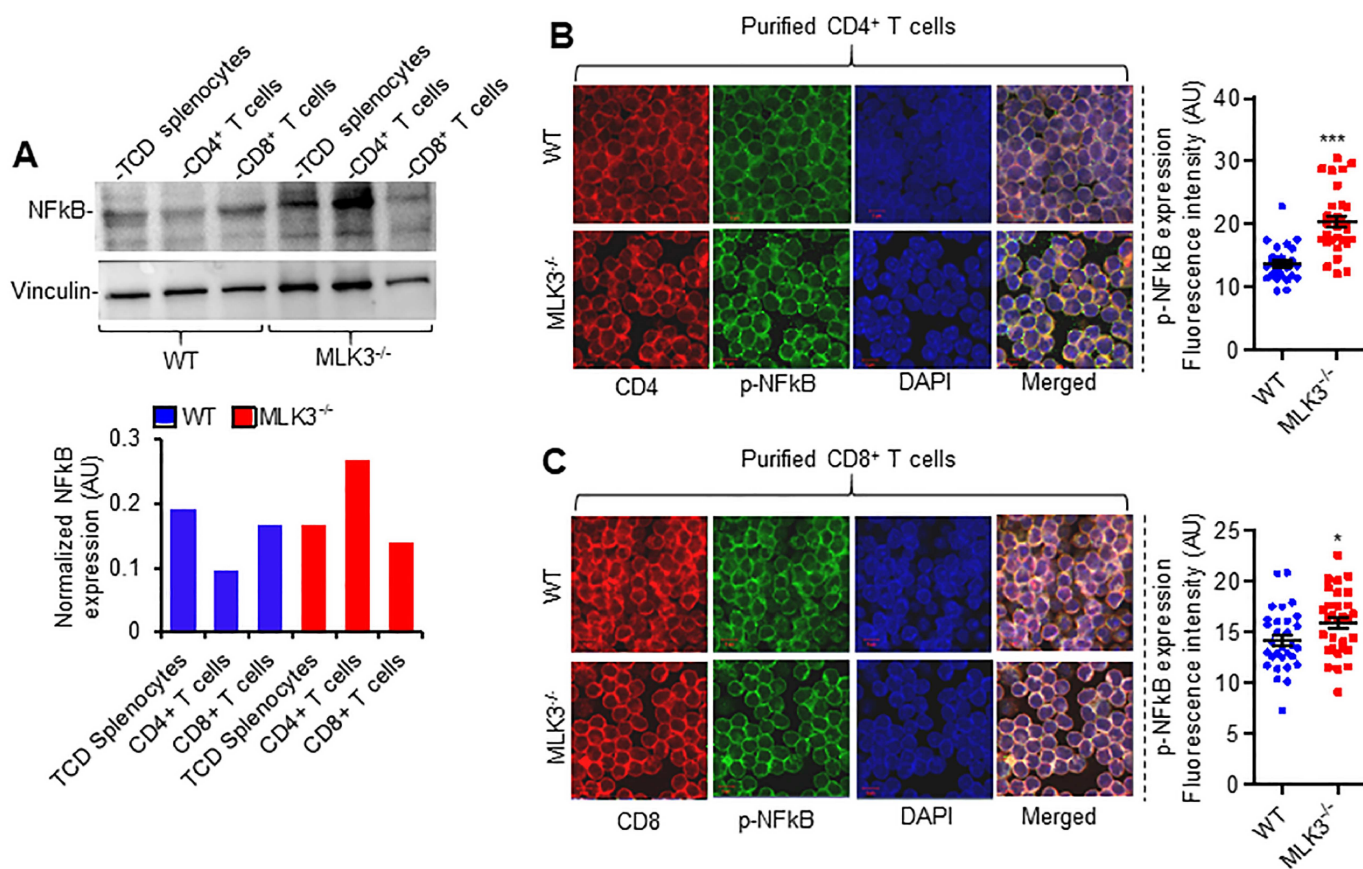

Supplement: inline-supplementary-material-3 [file inline-supplementary-material-3.pdf]

Fig. S3

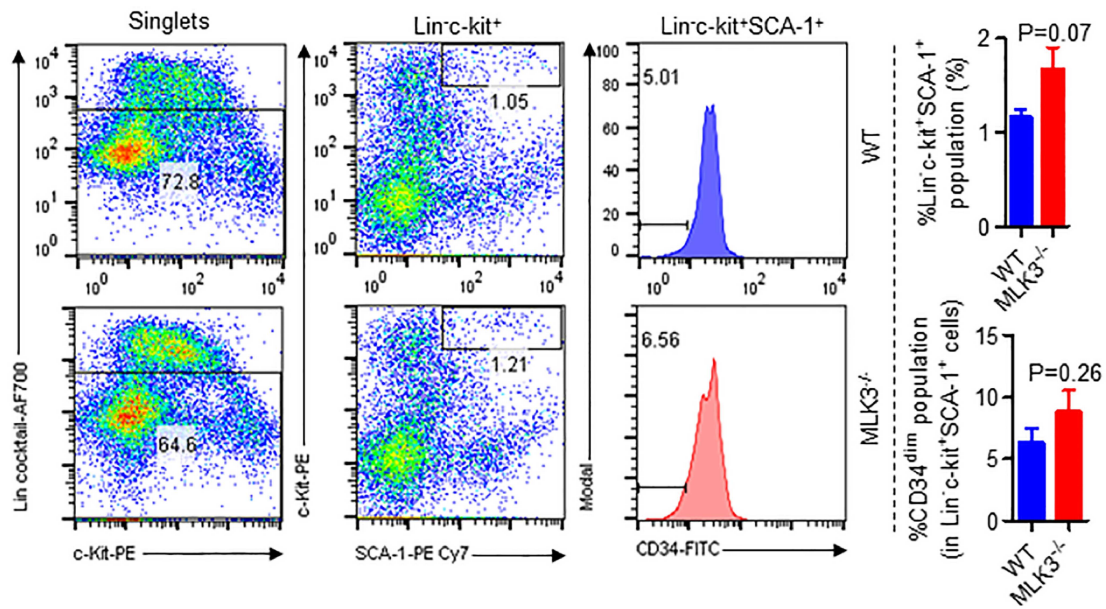

Supplement: inline-supplementary-material-4 [file inline-supplementary-material-4.pdf]

Fig. S4

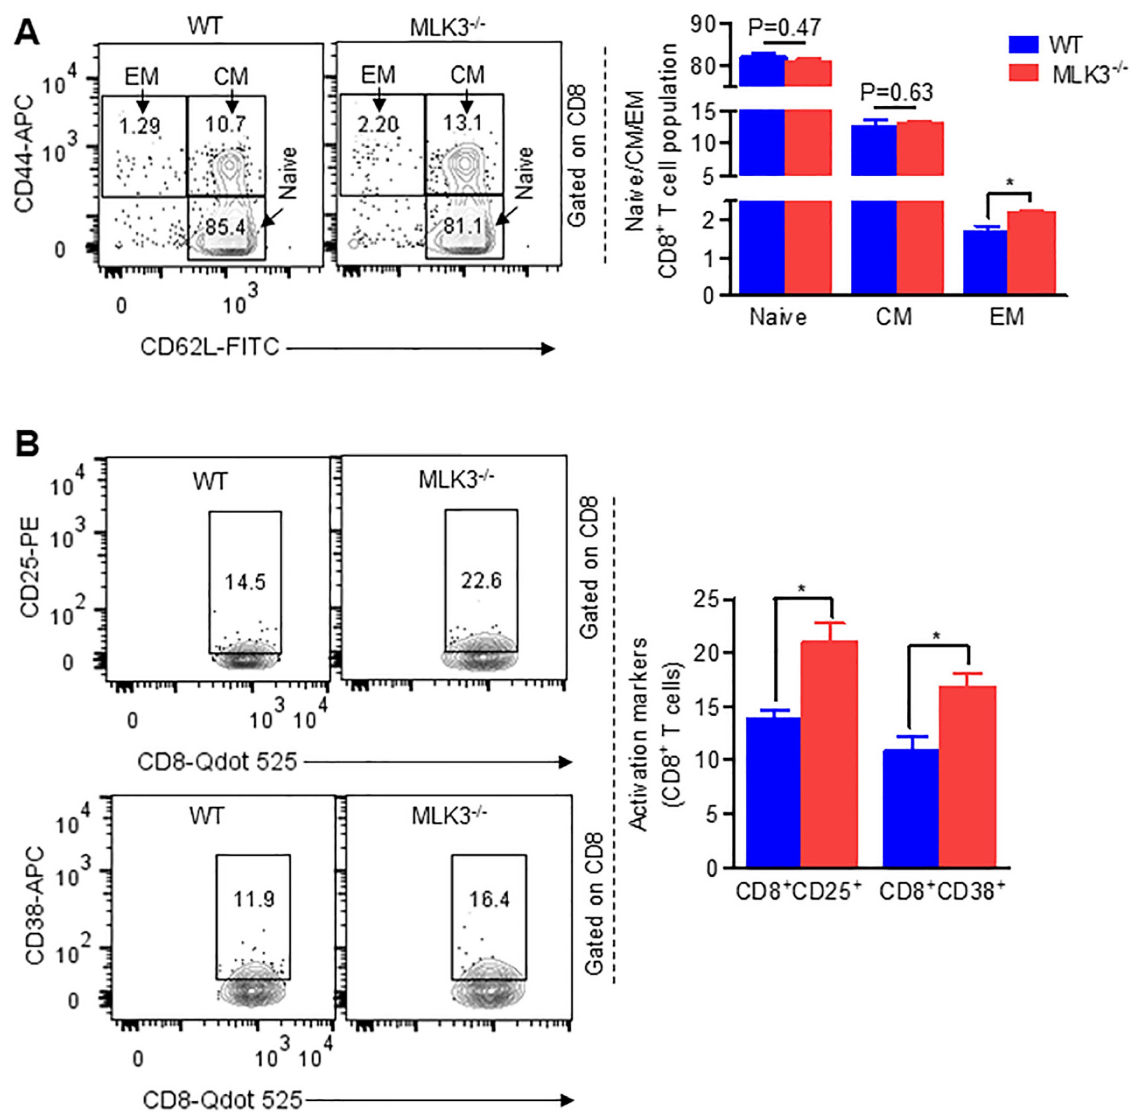

Supplement: inline-supplementary-material-6 [file inline-supplementary-material-6.pdf]

Fig. S5

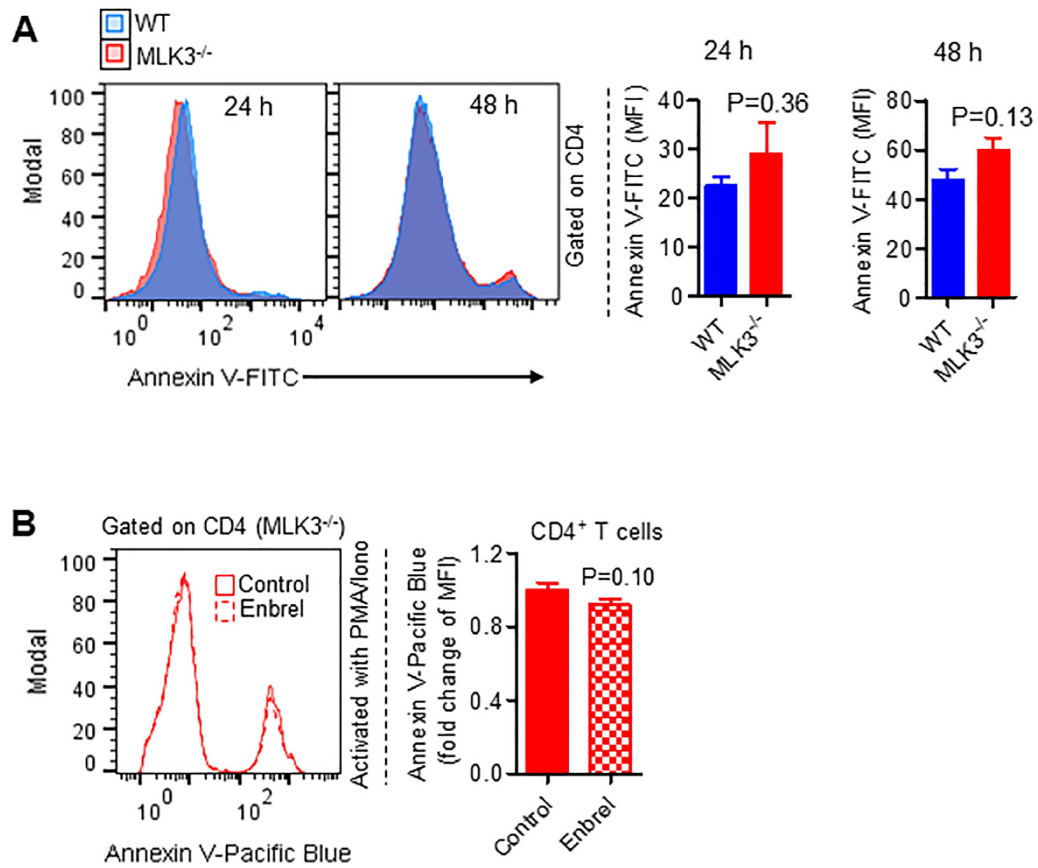

Supplement: inline-supplementary-material-7 [file inline-supplementary-material-7.pdf]

Fig. S6

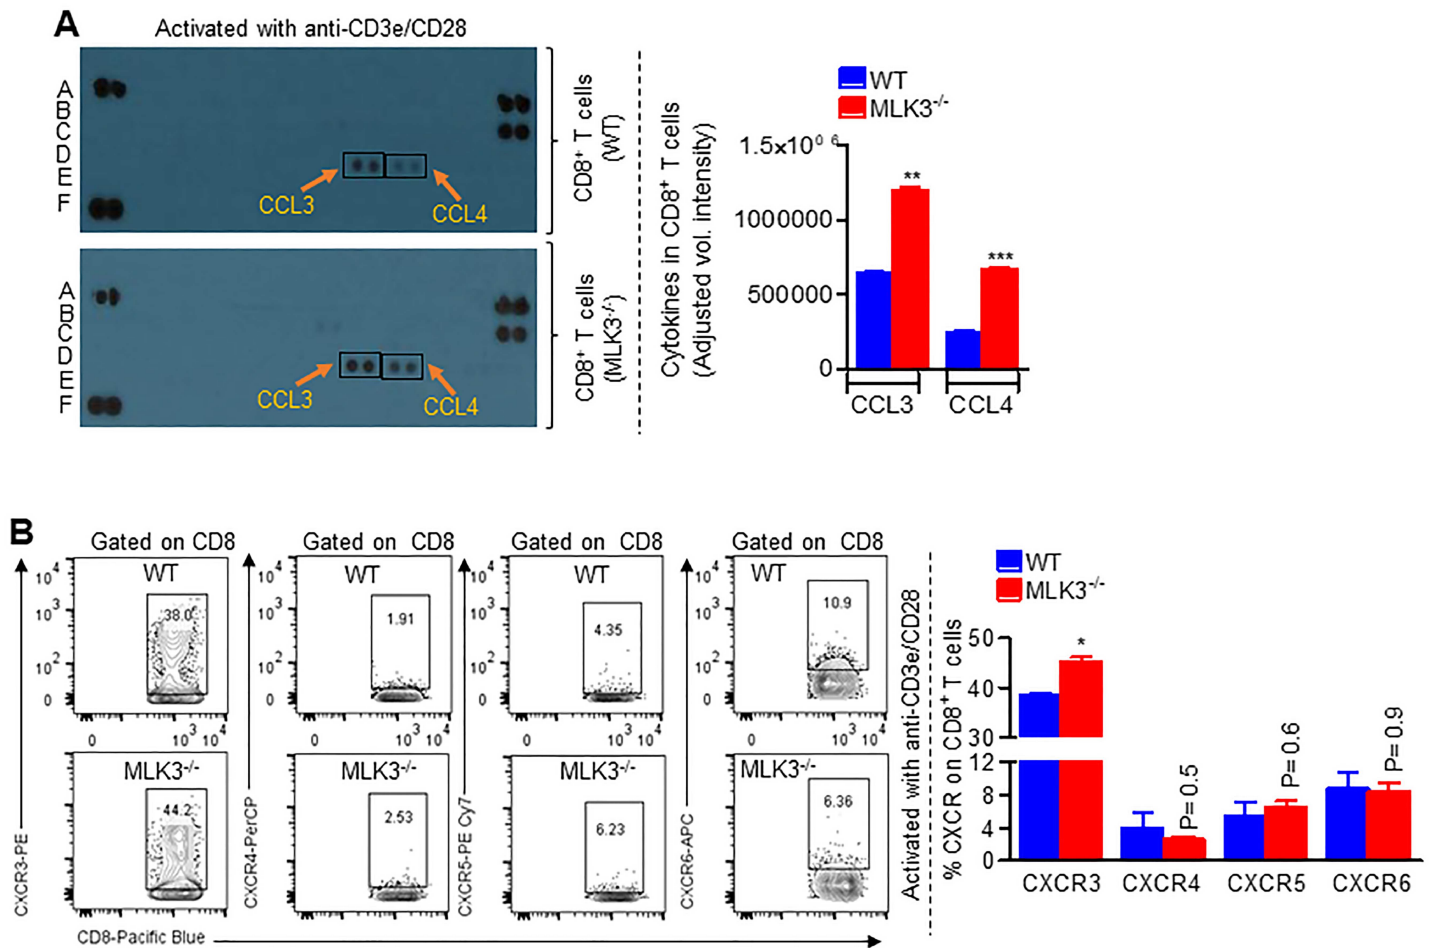

Supplement: inline-supplementary-material-9 [file inline-supplementary-material-9.pdf]
